# Supplementary material
Source: PubMed Central journal article supplement (PMC5330787)
Supplement: NIHMS834863-supplement-Acknowledgment_Permission_Form.pdf [file NIHMS834863-supplement-Acknowledgment_Permission_Form.pdf]

# Acknowledgment Permission Form

Journal   
Manuscript No.   
First author   
Title of work

## Acknowledgment Permission:

Authors must provide written permission/approval from all individuals mentioned by name in the Acknowledgements section of a submitted manuscript. By signing this form, any and all acknowledged persons therefore state that they have read and approved the mention of their names in the Acknowledgment section of the aforementioned paper.

Printed Name

Signature

Date

Printed Name

Signature

Date
