# Supplementary material
Source: PubMed Central journal article supplement (PMC5330787)
Supplement: NIHMS834863-supplement-Legacy_Supplemental_File.pdf [file NIHMS834863-supplement-Legacy_Supplemental_File.pdf]

## Change of Authorship Form

(Must be completed and signed by ALL authors)

Please check all that apply

New author(s) have been added (in addition to this form, all new authors must complete the copyright transfer agreement and conflict of interest disclosure.

Change in order of authorship.

An author wishes to remove his/her name. An author's name may only be removed his/her own request and a letter signed by the author should accompany this form

Manuscript Number STROKE/2016/015204R2

Manuscript Title Mir-17-92 cluster in exosomes enhance neuroplasticity and functional recovery after stroke in rats

### Former Authorship

Please list ALL AUTHORS in the same order as the original submission. For more than 12, use an extra sheet.

#### Print Name

Name (1) Hongqi Xin  
 Name (2) Mark katakowski  
 Name (3) Fengjie Wang  
 Name (4) Jian-Yong Qian  
 Name (5) Manoranjan Santra  
 Name (6) Xian Shuang Liu

#### Print Name

Name (7) Meser M. Ali  
 Name (8) Benjamin Buller  
 Name (9) Zheng Gang Zhang  
 Name (10) Michael Chopp  
 Name (11) \_\_\_\_\_  
 Name (12) \_\_\_\_\_

### New Authorship

All authors must sign below agreeing to the changes in authorship. The authorship order must reflect the authorship order of the manuscript.

|                                  |                              |                        |
|----------------------------------|------------------------------|------------------------|
| Name (1) <u>Hongqi Xin</u>       | Signature <u>[Signature]</u> | Date <u>11/14/2016</u> |
| Name (2) <u>Mark Katakowski</u>  | Signature <u>[Signature]</u> | Date <u>11/14/2016</u> |
| Name (3) <u>Fengjie Wang</u>     | Signature <u>[Signature]</u> | Date <u>11/14/2016</u> |
| Name (4) <u>Jian-Yong Qian</u>   | Signature <u>[Signature]</u> | Date <u>11/14/2016</u> |
| Name (5) <u>Xian Shuang Liu</u>  | Signature <u>[Signature]</u> | Date <u>11/14/2016</u> |
| Name (6) <u>Meser M. Ali</u>     | Signature <u>[Signature]</u> | Date <u>11/14/2016</u> |
| Name (7) <u>Benjamin Buller</u>  | Signature <u>[Signature]</u> | Date <u>11/14/2016</u> |
| Name (8) <u>Zheng Gang Zhang</u> | Signature <u>[Signature]</u> | Date <u>11/14/2016</u> |
| Name (9) <u>Michael Chopp</u>    | Signature <u>[Signature]</u> | Date <u>11/14/16</u>   |
| Name (10) _____                  | Signature _____              | Date _____             |
| Name (11) _____                  | Signature _____              | Date _____             |
| Name (12) _____                  | Signature _____              | Date _____             |

Please scan and email to [stroke@strokeahajournal.org](mailto:stroke@strokeahajournal.org).

November 14, 2016

Editor of STROKE,

Since I currently don't have contribution to the data used in the manuscript: " **MiR-17-92 cluster in exosomes enhance neuroplasticity and functional recovery after stroke in rats** (STROKE/2016/015204R2)". I would like to remove my authorship from the manuscript.

Yours sincerely,



Manoranjan Santra
